# Supplementary material
Source: PubMed Central journal article supplement (PMC6336138)
Supplement: 2458ab45ccd1266f3ca45816c0206c4a_MCB.00415-18-s0001.pdf [file 2458ab45ccd1266f3ca45816c0206c4a_MCB.00415-18-s0001.pdf]

1 **Table A1**

2 **Top 20 hits from the TNF $\alpha$  Secondary Screen** (Known NF- $\kappa$ B regulators are

3 underlined)

| Rank | Gene Name    | Known Gene Function(s)                      |
|------|--------------|---------------------------------------------|
| 1    | SNW1         | Transcription Co-activator, Splicing Factor |
| 2    | TNFR1        | TNF Receptor                                |
| 3    | UCHL3        | De-ubiquitinating Enzyme                    |
| 4    | <u>GHRH</u>  | Growth Hormone Releasing Hormone            |
| 5    | BMP10        | TGF Beta Activator                          |
| 6    | <u>NDP52</u> | Autophagy Regulator                         |
| 7    | CRHR2        | Corticotropin Releasing Hormone             |
| 8    | ATG7         | Autophagy Regulator                         |
| 9    | NEF3         | Neurofilament Protein                       |
| 10   | CFLAR        | Apoptosis Regulator                         |
| 11   | CLCN2        | Ion Channel                                 |
| 12   | KDM4A        | Histone Demethylase                         |
| 13   | HAPLN2       | Extra-cellular Matrix Protein               |
| 14   | BHMT2        | Methyltransferase                           |
| 15   | PARVA        | Matrix Remodeler                            |
| 16   | <u>RELA</u>  | NF- $\kappa$ B                              |
| 17   | C5ORF11      | Unknown Function                            |
| 18   | TRPC6        | Ion Channel                                 |
| 19   | LCE1B        | Keratinization                              |
| 20   | CX3CL1       | Chemokine                                   |

4

5

6

7 **Table A2.**

8 **Top 20 hits from the LPS Secondary Screen (Known NF-κB regulators are underlined)**

| Rank | Gene Name    | Known Gene Function(s)                      |
|------|--------------|---------------------------------------------|
| 1    | SNW1         | Transcription Co-activator, Splicing Factor |
| 2    | UCHL3        | De-ubiquitinating Enzyme                    |
| 3    | CFLAR        | Apoptosis Regulator                         |
| 4    | PRKCG        | Protein Kinase C Gamma                      |
| 5    | TRPC6        | Ion Channel                                 |
| 6    | DUSP15       | Dual Specificity Phosphatase                |
| 7    | <u>KPNA1</u> | Importin                                    |
| 8    | BHMT2        | Methyltransferase                           |
| 9    | GRIN2B       | NMDA Receptor                               |
| 10   | ITCH         | E3 Ub Ligase                                |
| 11   | APC2         | Wnt Regulator                               |
| 12   | CINP         | CDK Interacting Protein                     |
| 13   | <u>RELA</u>  | NF-κB                                       |
| 14   | <u>RIP1</u>  | NF-κB Receptor Activator                    |
| 15   | FOSB         | Transcription Factor (with Jun)             |
| 16   | <u>TLR4</u>  | LPS Receptor                                |
| 17   | KEL          | Metallo-peptidase                           |
| 18   | KDM4A        | Histone Demethylase                         |
| 19   | BFAR         | Apoptosis Regulator                         |
| 20   | ATG7         | Autophagy Regulator                         |

9

10

11

12

13 **Table A3**

14 **The top hits from endogenous validation in U87 cells**

| Rank | Gene Name | Possible mechanism for regulating NF- $\kappa$ B  |
|------|-----------|---------------------------------------------------|
| 1    | SNW1      | Co-activator, NF- $\kappa$ B target gene splicing |
| 2    | GHRH      | Via PAK-1 or STAT3                                |
| 3    | UCHL3     | De-ubiquitination of complexes upstream of IKK    |
| 4    | BHMT2     | Methyl-transferase (PTM of p65)                   |
| 5    | KDM4A     | Histone demethylase – regulating chromatin        |
| 6    | CFLAR     | Via reported RIP1 association                     |
| 7    | TRPC6     | Ion channel – at the receptor level               |
| 8    | BFAR      | Cross talk with Apoptosis                         |
| 9    | DGKK      | Kinase – unknown                                  |
| 10   | CUL1      | Via ubiquitination of complexes upstream of IKK   |
| 11   | PRKCG     | Kinase – phosphorylation of a key pathway protein |
| 12   | PARVA     | Via matrix remodeling                             |
| 13   | GABARAP   | Cross talk with autophagy (ATG5, ATG7)            |
| 14   | NEF3      | Via matrix remodeling                             |

15

16

17

18

19

20

21

22

23
